# Supplementary material for: The tin(ii) precursor is an active site to determine the crystal framework in CsSnI3 perovskite
Source: Royal Society of Chemistry journal article supplement (doi:10.1039/d1ta07121a), 2022-01-01
Supplement: d1ta07121a1.pdf [file d1ta07121a1.pdf]

## **Supplementary Information**

### **Tin(II) Precursor is an Active Site to determine the Crystal Framework in CsSnI<sub>3</sub> Perovskite**

Yu Jin Kim <sup>a</sup> and Dong-Won Kang <sup>a,b,\*</sup>

<sup>a</sup> School of Energy Systems Engineering, Chung-Ang University, Seoul 06974, Republic of  
Korea

<sup>b</sup> Department of Smart City, Chung-Ang University, Seoul 06974, Republic of Korea

## **ADDITIONAL EXPERIMENTS**

### **Additional Materials**

Poly(3,4-ethylenedioxythiophene) polystyrene sulfonate (PEDOT:PSS, Clevios™ P VP AI 4083) was purchased from Heraeus. Phenyl-C61-butyric acid methyl ester (PC<sub>61</sub>BM) was purchased from Organic Semiconductor Materials (OSM Co., Ltd.). Bathocuproine (BCP, 98 %) was obtained from Alfa Aesar. Chlorobenzene (anhydrous, ≥ 99.8 %) and Isopropanol (anhydrous, ≥ 99.5 %) were obtained from Sigma-Aldrich and used for PC<sub>61</sub>BM and BCP solution, respectively.

### **Preparation of Perovskite Precursor Solutions**

A CsSnI<sub>3</sub> perovskite precursor solution including each precursor such as CsI, SnI<sub>2</sub>, or SnF<sub>2</sub> was prepared as dissolving the materials in DMF, DMSO, or DMF:DMSO (1:4 v/v) mixed solvent. The precursor solutions were stirred on the hot plate under the 50 °C heating condition in the N<sub>2</sub>-filled glove box.

### **Crystal Growth of Sn<sup>2+</sup> Precursor-based Crystals or CsSnI<sub>3</sub> perovskites with ATMS**

SnI<sub>2</sub> (0.298 g - 0.8 M concentration) + SnF<sub>2</sub> (0.026 g - 0.16 M concentration) precursor solutions with various ATMS amount (0.1, 0.5, 1, 2, 4, and 8 % v/v) were prepared under the 50 °C heating temperature in the N<sub>2</sub>-filled glove-box for 2 h. The precursor solutions were spin-cast onto the indium tin oxide (ITO)/PEDOT:PSS substrate with a spinning speed of 1000 rpm (10 s) and 5000 rpm (45 s). The deposited tin precursor layer was aged at room temperature for 30 min and annealed at 70 °C for 10 min. With a similar method, the CsSnI<sub>3</sub> crystal film including ATMS anion was generated from a CsSnI<sub>3</sub> + ATMS precursor solution. The crystal was grown on the ITO/PEDOT:PSS substrate by spin-coating and annealing process.

### **Fabrication of CsSnI<sub>3</sub> Perovskite Solar Cells**

An ITO-coated glass substrate was sequentially cleaned under ultra-sonication with acetone

and isopropyl alcohol for 30 min, respectively. The cleaned-ITO substrate was treated with UV ozone for 20 min to remove additional alien materials on the surface of the substrate. A PEDOT:PSS that have storage in the refrigerator at ca. 5 °C was spin-cast onto the pretreated ITO substrate with a ~ 40 nm thickness in the air. The ITO/PEDOT:PSS substrate was transferred to the N<sub>2</sub>-filled glove box. A perovskite precursor solution (SnI<sub>2</sub> + SnF<sub>2</sub> or CsSnI<sub>3</sub>) was prepared with proper concentration and/or stoichiometric ratio under 50 °C temperature. The solution was deposited onto the ITO/PEDOT:PSS substrate with a 0.2 μm filtration by spin-coating, the perovskite-coated substrate was subsequently annealed on the hot plate. A PC<sub>61</sub>BM layer (20 mg ml<sup>-1</sup> concentration in chlorobenzene) was deposited above the perovskite crystal film with a spinning rate of 1500 rpm and annealed at 70 °C for 10 min. Finally, a ca. 120 nm of silver (Ag) was deposited as a top electrode by thermal evaporation under  $1.2 \times 10^{-5}$  Torr.

### **General Characterization**

UV-vis absorption spectra with a baseline correction were recorded using a UV-2700 spectrometer (Shimadzu, Japan). The measurement system was two-detector absorbance mode and the slit width was 5 nm. Scan speed and data intervals were 100 nm/min (medium) and 0.05 nm, respectively. For the solution samples, perovskite precursor solutions were filled in a quartz cuvette with a path length of 10 nm and measured. Perovskite film was coated onto the ITO/PEDOT:PSS substrate and scanned as a solid state. A DMF or DMSO solution and ITO/PEDOT:PSS substrate were used as a reference sample for the solution and solid system, respectively.

Transmission electron microscopy (TEM) was conducted to obtain lattice phases of perovskite crystals at a solution or solid state. JEOL-2100F or JEM-F200 instrument equipped with a high-angle annular dark-field (HAADF) was operated at an acceleration voltage of 200 kV. The high-resolution (HR) TEM images were recorded at various focus and magnification

(1.0, 1.2, or 1.5 M) conditions. For the solution samples, perovskite precursor dispersions were diluted 1/6 in DMF:DMSO (1:4) mixed solution, and they were dropped onto the carbon support film grids (300 mesh, Cu). For the film samples, perovskite crystals that were grown on the ITO/PEDOT:PSS substrate were scratched and dropped onto the same grids as the solution sample. A droplet of anti-solvent was dropped onto the grid to fix the scratched powders. Samples were dried in vacuum condition for over 70 h before loading into the TEM instrument. All the TEM sample preparation processes were conducted in the N<sub>2</sub>-filled glovebox.

Attenuated total reflectance Fourier transform infrared (ATR-FTIR) spectra were recorded on a TENSOR 27 (Bruker, Germany) with a platinum ATR accessory at room temperature. A DLATGS detector that provides a resolution of 4 cm<sup>-1</sup> was used and scan time was 32. The liquid samples were filled into the ATR accessory with ca. 300 μl, and then measured.

<sup>1</sup>H NMR and <sup>119</sup>Sn NMR spectra of the perovskite precursor samples were recorded by using an AvanceIII 500 MHz spectrometer (Bruker, Germany) with a 5 mm HR-MAS probe. The samples were dispersed in DMSO-d<sub>6</sub> solvent (concentration = 0.75 mL) and filled into the NMR tube to measure. Tetramethyltin was used as a reference for the <sup>119</sup>Sn NMR measurements.

A New D8-Advance X-ray diffractometer (Cu Kα radiation, 8.04 keV) equipped with a diffracted beam monochromator was employed to measure the crystal diffraction patterns of perovskite films. All XRD data were recorded with a coupled two theta (2θ)/theta mode in the 2θ range from 10° to 50° at room temperature. The scanning rate was 2° min<sup>-1</sup> and the X-ray exposure time per point was 0.5 s.

The surface morphologies of perovskite films were investigated by field emission scanning electron microscopy (FE-SEM) using a JSM-7100F (JEOL, Ltd.) instrument. An acceleration voltage was 20 kV and the focused images were obtained at various magnifications.

Transmission small-angle X-ray scattering (SAXS) measurements were conducted at the 4C SAXS-II beamline of the PLS-II synchrotron facility, Pohang Accelerator Laboratory (Pohang, Korea). The X-ray beam with an energy of 16.09 keV was used, and scattering data were collected with a two-dimensional charged-coupled detector (CCD: model Rayonix 2D SX 165). The beam was exposed to solution samples in 1.5 mm quartz capillaries and the exposure time was set to 10 s for each sample. The capillary cell (a thickness of 0.01 mm and an external diameter of 1.5 mm, Charles Supper Company) was placed in a metal holder with a lateral direction to eliminate the thickness effect of the capillary cell. When the solution was changed, the cell was washed to di-water and acetone 3 times. Sample-to-detector distance (SDD) was 1.0 m with a confidence interval,  $0.032 \text{ \AA}^{-1} < q < 0.700 \text{ \AA}^{-1}$ . The scattering angles were calibrated by using a pre-calibrated Ti-SBA-15 (Sigma-Aldrich) and silver behenate (Tokyo Chemical Industry) as standards. Buffer solutions (DMF, DMSO, or DMF:DMSO) were separately measured and subtracted from perovskite solutions in SAXS data treatment.

### **Device Characterization**

All device measurements were carried out in ambient conditions (room temperature and relative humidity (RH) of 30 - 35 %). Current-voltage ( $J$ - $V$ ) characteristics of solar cell devices were measured using a solar simulator (PEC-L01, Peccell Technologies) under standard AM1.5 illumination ( $100 \text{ mW cm}^{-2}$ ). The light source was calibrated with a silicon photodiode detector (BS-500BK, BUNKOUKEIKI CO., LTD.). Each device was measured with a scan rate of  $100 \text{ mV s}^{-1}$  using a Keithley 2400 source meter. The external quantum efficiency (EQE) spectra were characterized using a CompactStat instrument (Ivium Technologies; Eindhoven, Netherlands) with a power source (Abet Technologies 150 W xenon lamp, 13014) and a monochromator (DongWoo Opteron, MonoRa500i). The system was calibrated with the same photodiode detector for the solar simulator.

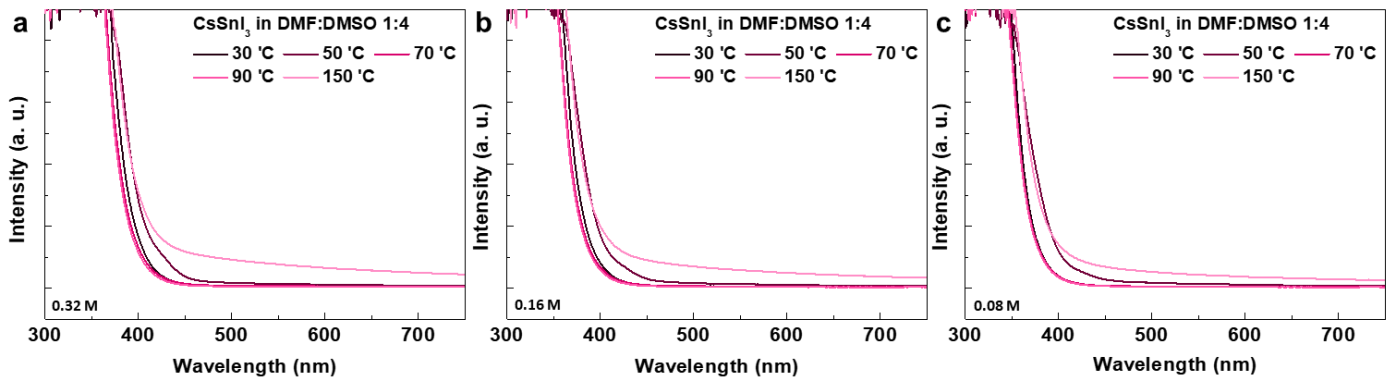

**Fig. S1** UV-vis absorption spectra of CsSnI<sub>3</sub> precursor solution dissolved in DMF:DMSO mixed solvent with 1:4 volume ratio at various measurement conditions that control the solution concentration: (a) 0.32 mM, (b) 0.16 mM, and (c) 0.08 mM.

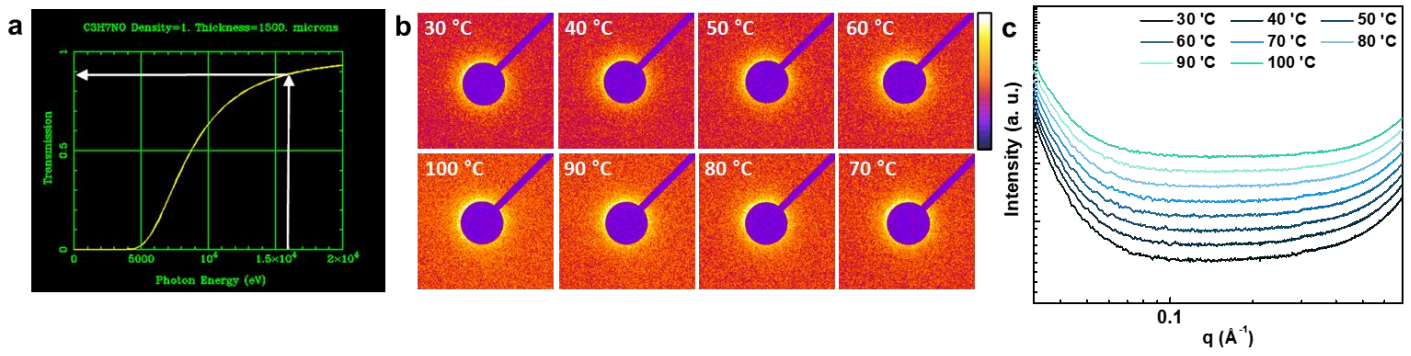

**Fig. S2** Transmission SAXS results with the theoretical X-ray transmission factor for DMF solvent: (a) X-ray photon energy versus transmission curve, (b) two-dimensional diffraction patterns, and (c) corresponding average radial integrations.

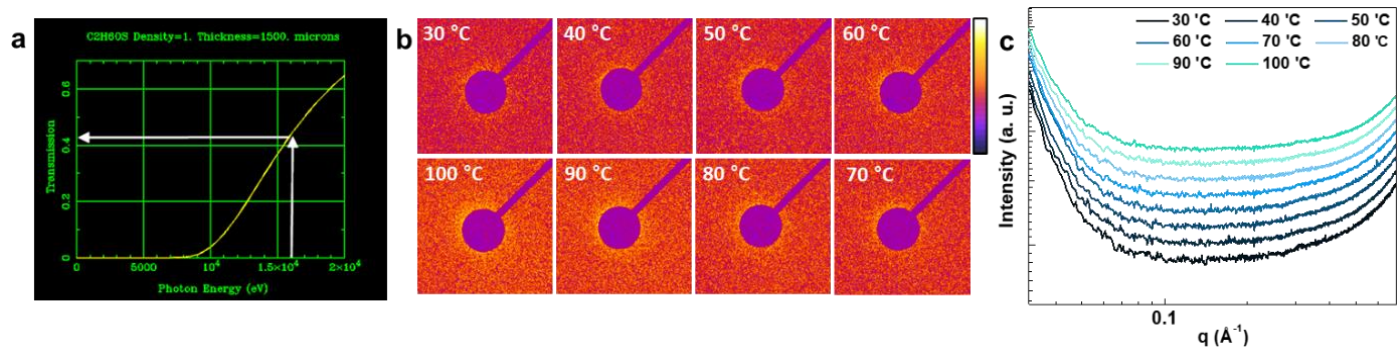

**Fig. S3** Transmission SAXS results with the theoretical X-ray transmission factor for DMSO solvent: (a) X-ray photon energy versus transmission curve, (b) 2D diffraction patterns, and (c) corresponding average 1D profiles.



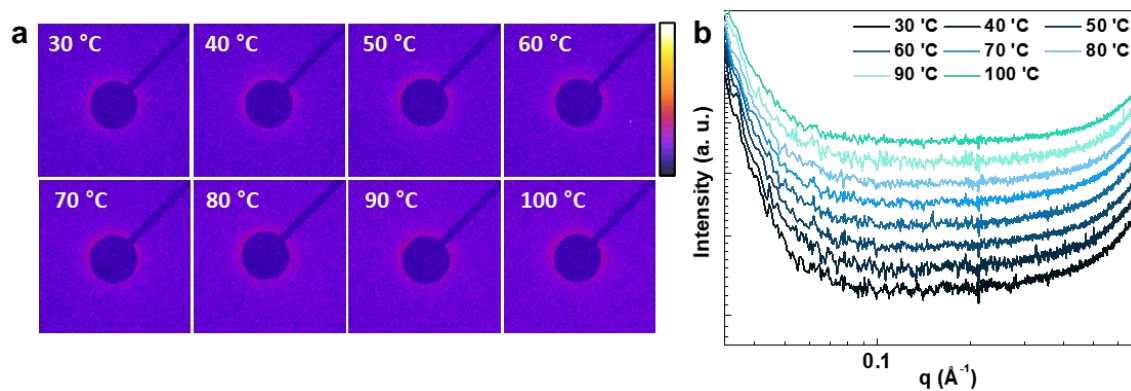

**Fig. S4** Transmission SAXS results for DMF:DMSO mixed solvent: (a) two-dimensional diffraction patterns, and (c) corresponding average 1D integrated plots.

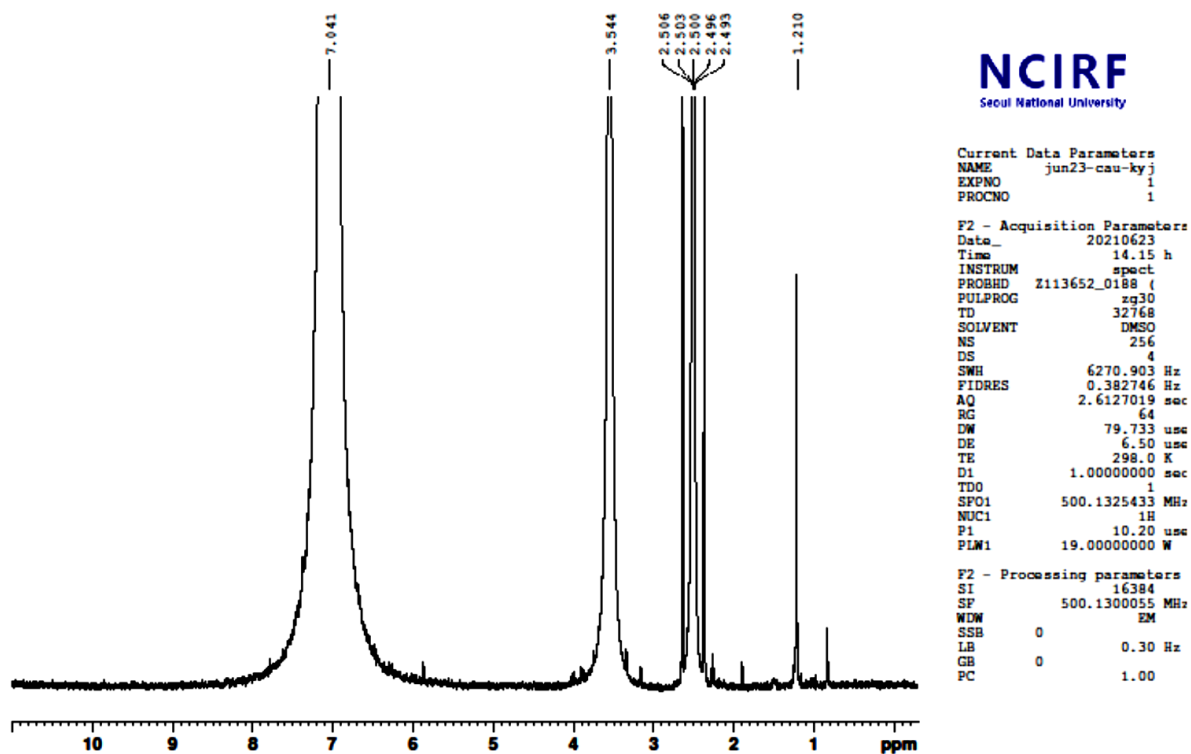

Fig. S5  $^1\text{H}$  NMR spectrum of ATMS sample in deuterated DMSO- $d_6$  solution.

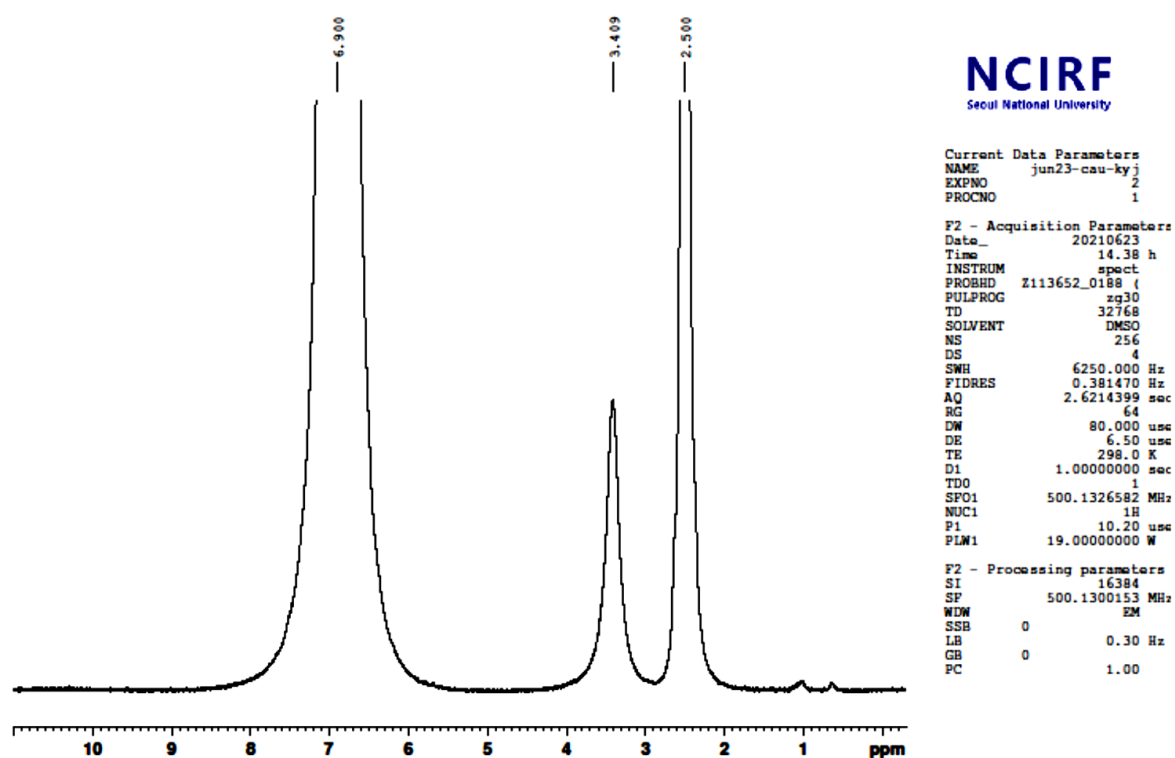

**Fig. S6**  $^1\text{H}$  NMR spectrum of  $\text{CsSnI}_3$  - ATMS sample in deuterated  $\text{DMSO-d}_6$  solution.

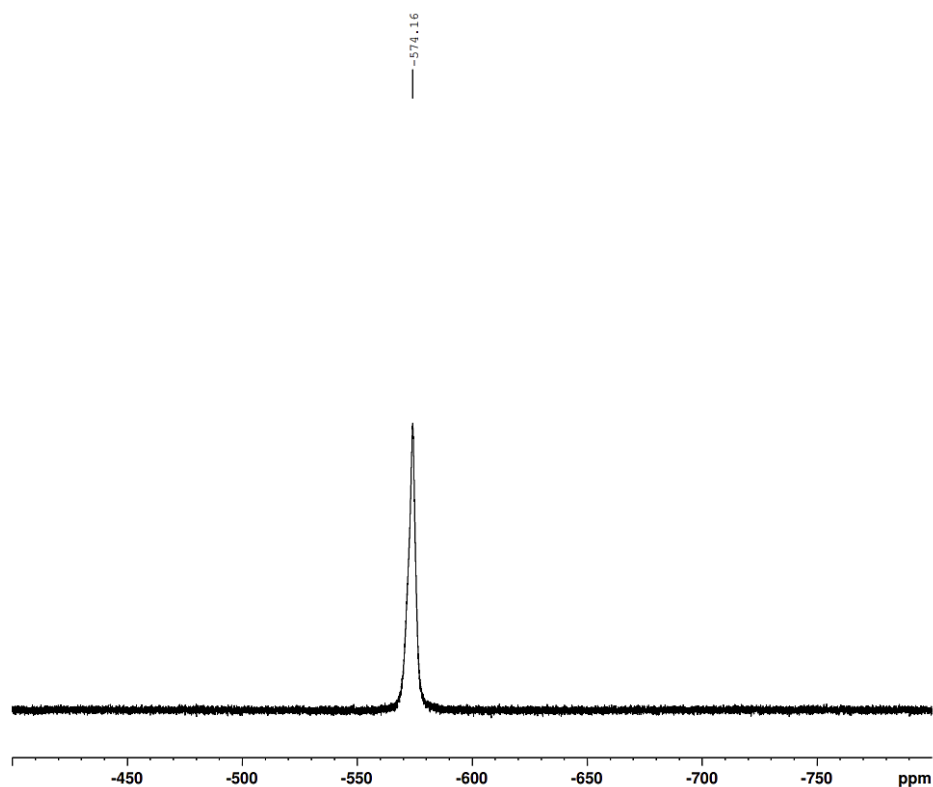

**NCIRF**  
Seoul National University

```

Current Data Parameters
NAME      jun23-cau-kyj
EXPNO    4
PROCNO    1

F2 - Acquisition Parameters
Date_     20210624
Time      1.09 h
INSTRUM   spect
PROBHD    Z113652_0188 (
PULPROG   zgpg30
TD         65536
SOLVENT   DMSO
NS         6144
DS         4
SWH        81521.742 Hz
FIDRES     2.487846 Hz
AQ         0.4019541 sec
RG         2050
DW         6.133 usec
DE         6.50 usec
TE         298.0 K
D1         2.00000000 sec
D11        0.03000000 sec
TDO        1
SFO1       186.3897370 MHz
NUC1       119Sn
P1         13.00 usec
PLW1       54.95399857 W
SFO2       500.1320005 MHz
NUC2       1H
CPDPRG[2] waltz16
PCPD2      80.00 usec
PLW2       19.00000000 W
PLW12      0.30886999 W
PLW13      0.15536000 W

F2 - Processing parameters
SI         32768
SF         186.5016380 MHz
WDW        EM
SSB        0
LB         2.00 Hz
GB         0
PC         1.40

```

**Fig. S7**  $^{119}\text{Sn}$  NMR spectrum of  $\text{CsSnI}_3$  perovskite in deuterated  $\text{DMSO-d}_6$  solution.

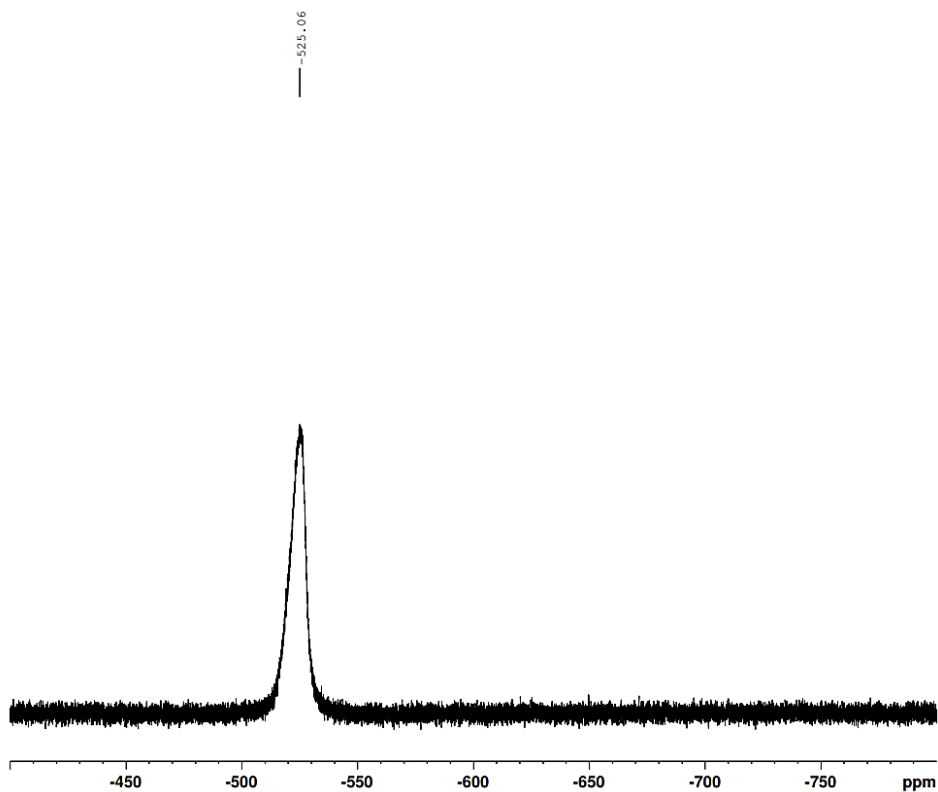

**NCIRF**  
Seoul National University

```

Current Data Parameters
NAME      jun23-cau-kyj
EXPNO     3
PROCNO    1

F2 - Acquisition Parameters
Date_     20210623
Time      20.52 h
INSTRUM   spect
PROBHD    Z113652_0188 (
PULPROG   zgpg30
TD         65536
SOLVENT   DMSO
NS         6144
DS         4
SWH        81521.742 Hz
FIDRES     2.487846 Hz
AQ         0.4019541 sec
RG         575
DW         6.133 usec
DE         6.50 usec
TE         298.0 K
D1         2.00000000 sec
D11        0.03000000 sec
TD0        1
SFO1       186.3897370 MHz
NUC1       119Sn
F1         13.00 usec
PLW1       54.95399857 W
SFO2       500.1320005 MHz
NUC2       1H
CPDPRG[2] waltz16
PCPD2      80.00 usec
PLW2       19.00000000 W
PLW12      0.30886999 W
PLW13      0.15536000 W

F2 - Processing parameters
SI         32768
SF         186.5016380 MHz
WDW        EM
SSB        0
LB         2.00 Hz
GB         0
PC         1.40

```

**Fig. S8**  $^{119}\text{Sn}$  NMR spectrum of  $\text{CsSnI}_3$  perovskite precursor with ATMS anion in deuterated  $\text{DMSO-d}_6$  solution.

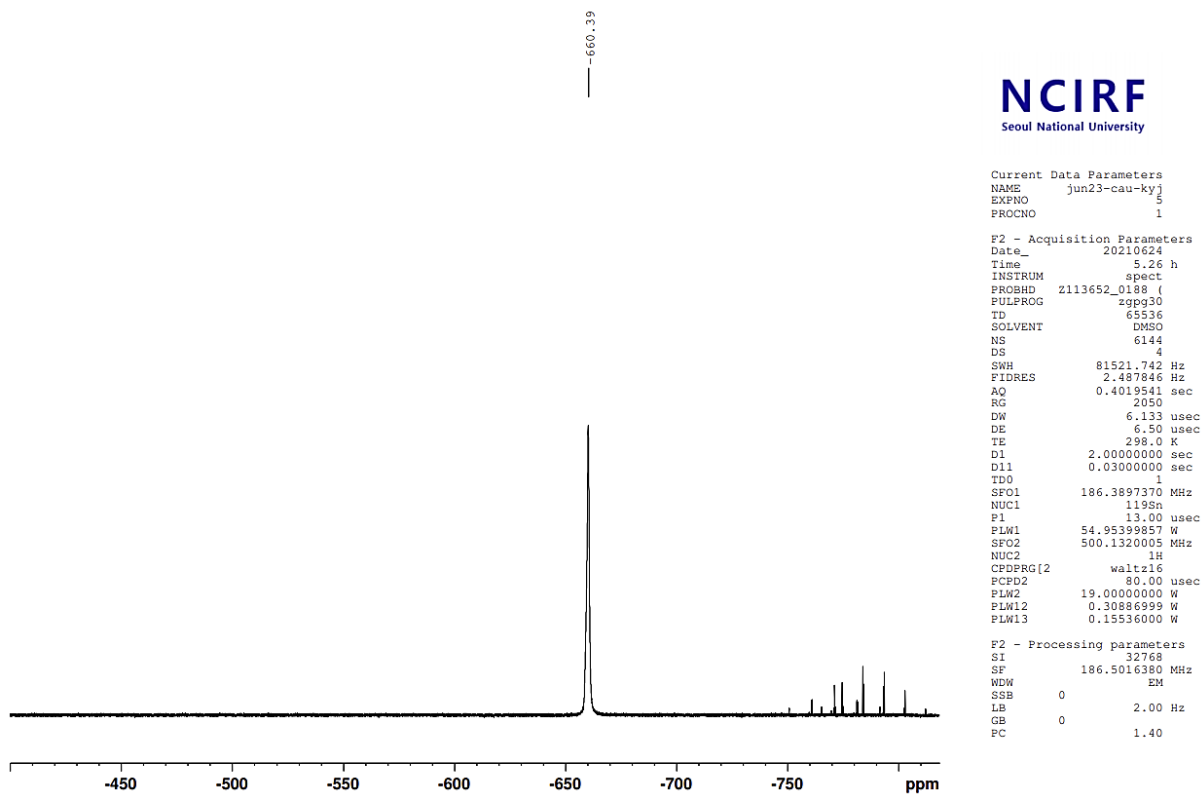

**Fig. S9**  $^{119}\text{Sn}$  NMR spectrum of  $\text{SnI}_2$  precursor with  $\text{SnF}_2$  in deuterated  $\text{DMSO-d}_6$  solution.

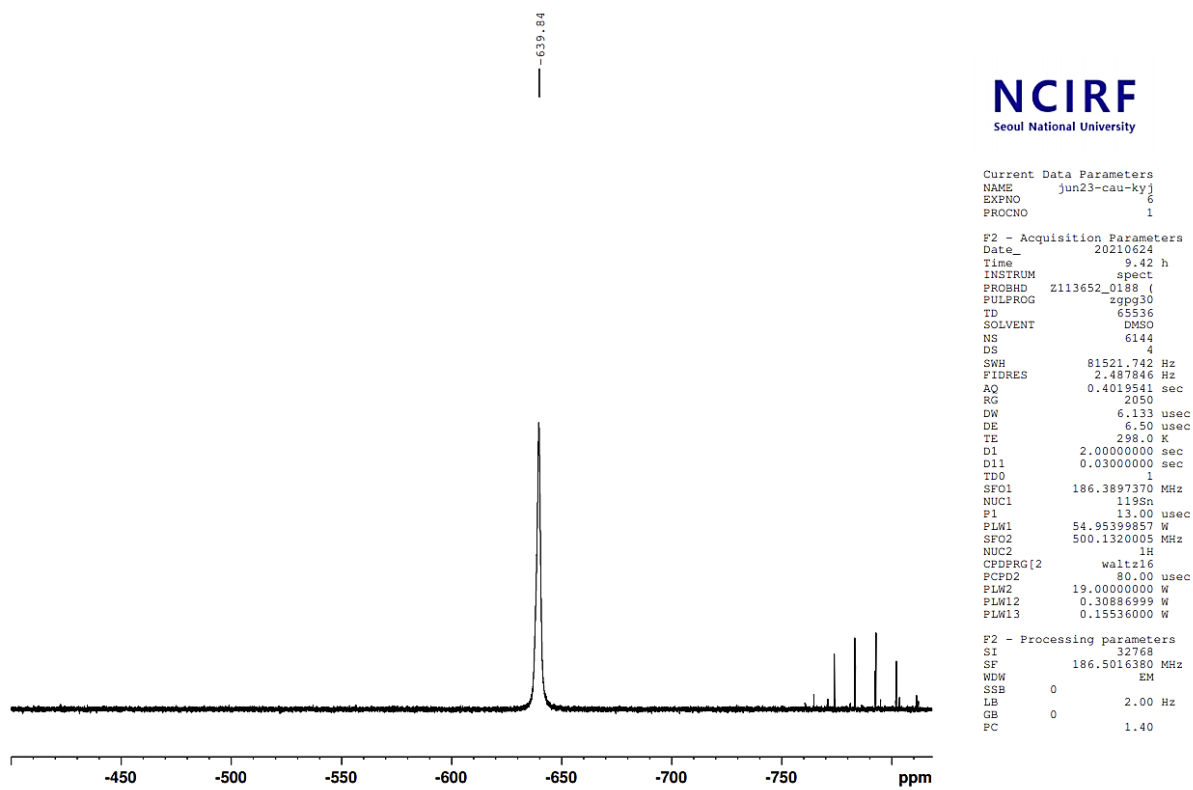

**Fig. S10**  $^{119}\text{Sn}$  NMR spectrum of  $\text{SnI}_2 + \text{SnF}_2$  sample with ATMS anion in deuterated  $\text{DMSO-d}_6$  solution.

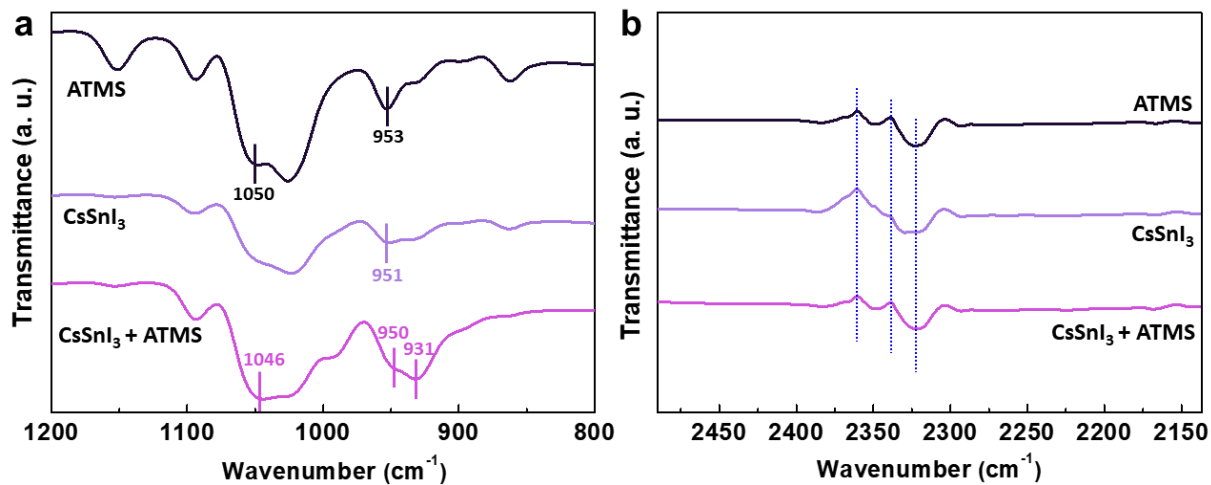

**Fig. S11** Partial magnification spectra from Figure 3d with a range of (a) 1200 – 800 cm<sup>-1</sup> and (b) 2490 – 2140 cm<sup>-1</sup>.



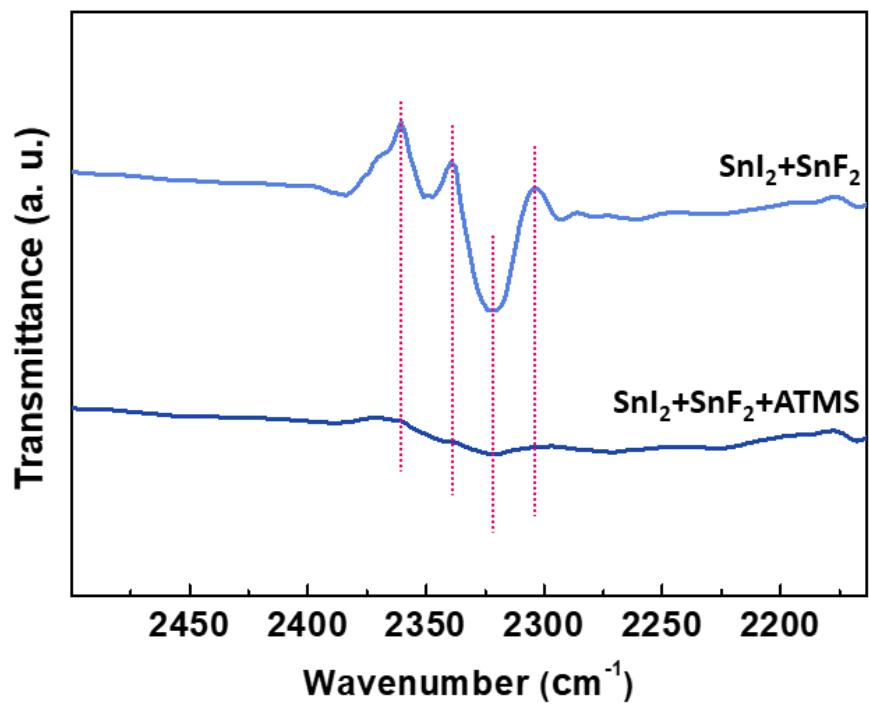

**Fig. S12** Magnification of FTIR spectra from Figure 3e with a range from 2160 to 2500 cm<sup>-1</sup>.

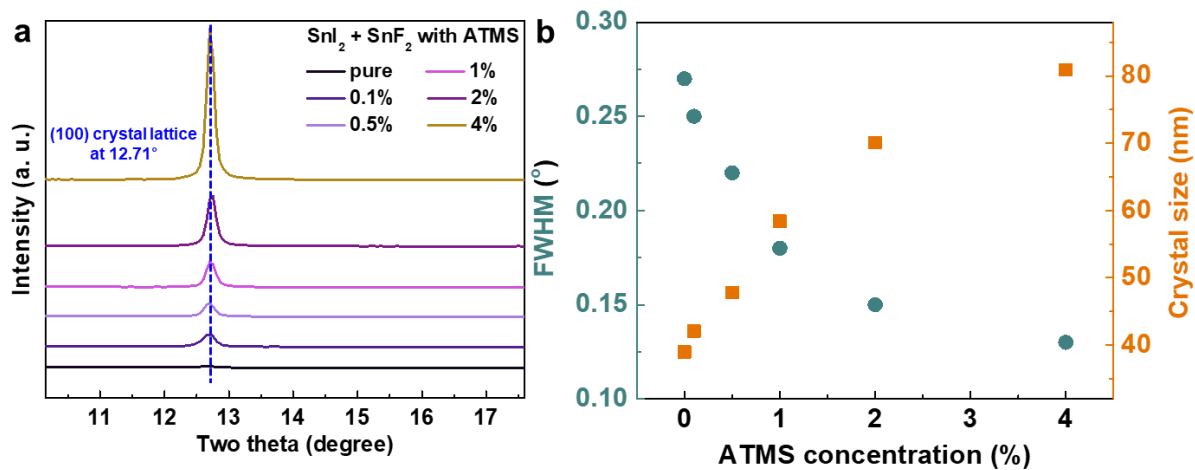

**Fig. S13** (a) Magnified XRD results from Fig. 4c to highlight the (100) crystal lattice peak. (b) The trends of FWHM and corresponding calculated crystal size of  $\text{SnI}_2 + \text{SnF}_2$  precursor as a function of ATMS concentration.

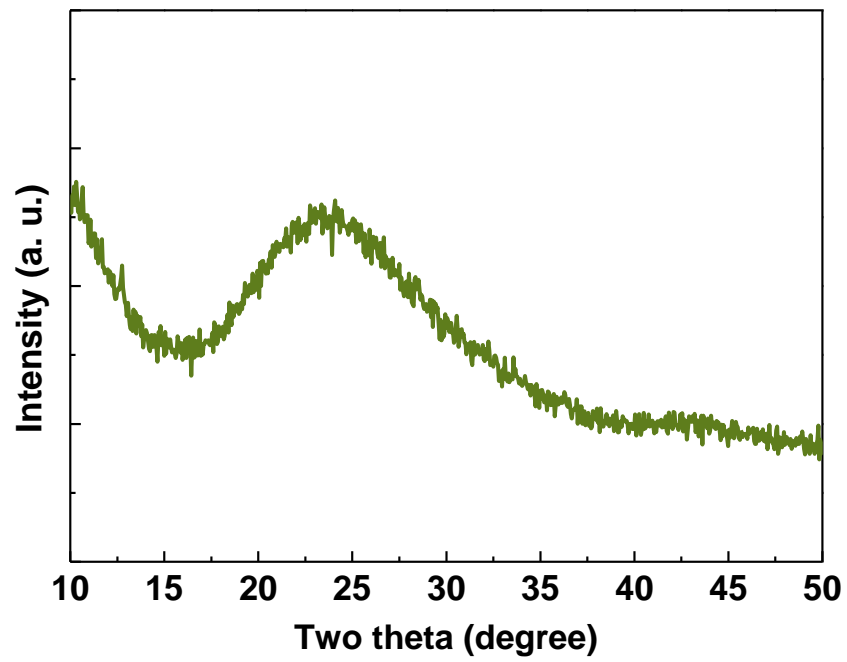

**Fig. S14** A XRD pattern of  $\text{SnI}_2 + \text{SnF}_2$  precursor film with ATMS of 8% concentration.

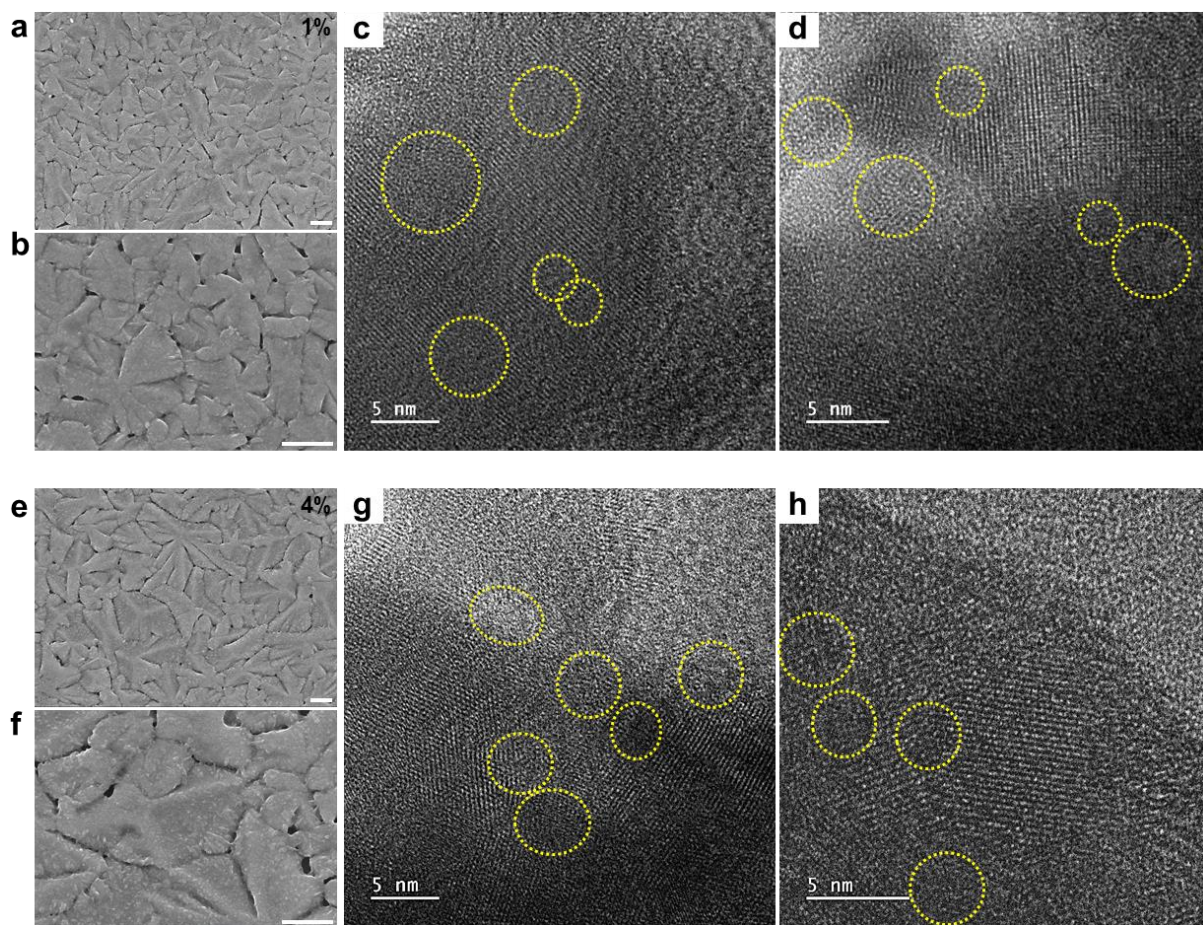

**Fig. S15** CsSnI<sub>3</sub> crystal structures with ATMS anion of 1% (a-d) and 4% (e-h) concentrations. They were created from a conventional (mixed single – CsSnI<sub>3</sub> + ATMS) solution: (a-b and e-f) SEM images. Two images for each condition have different magnifications. The scale bar is 1 μm. (c-d and g-h) TEM images. Two images for each condition were measured by 1.0 M (left) and 1.2 M (right) magnification. Yellow circle dash lines show the collapsed crystal lattices in the CsSnI<sub>3</sub> phase.

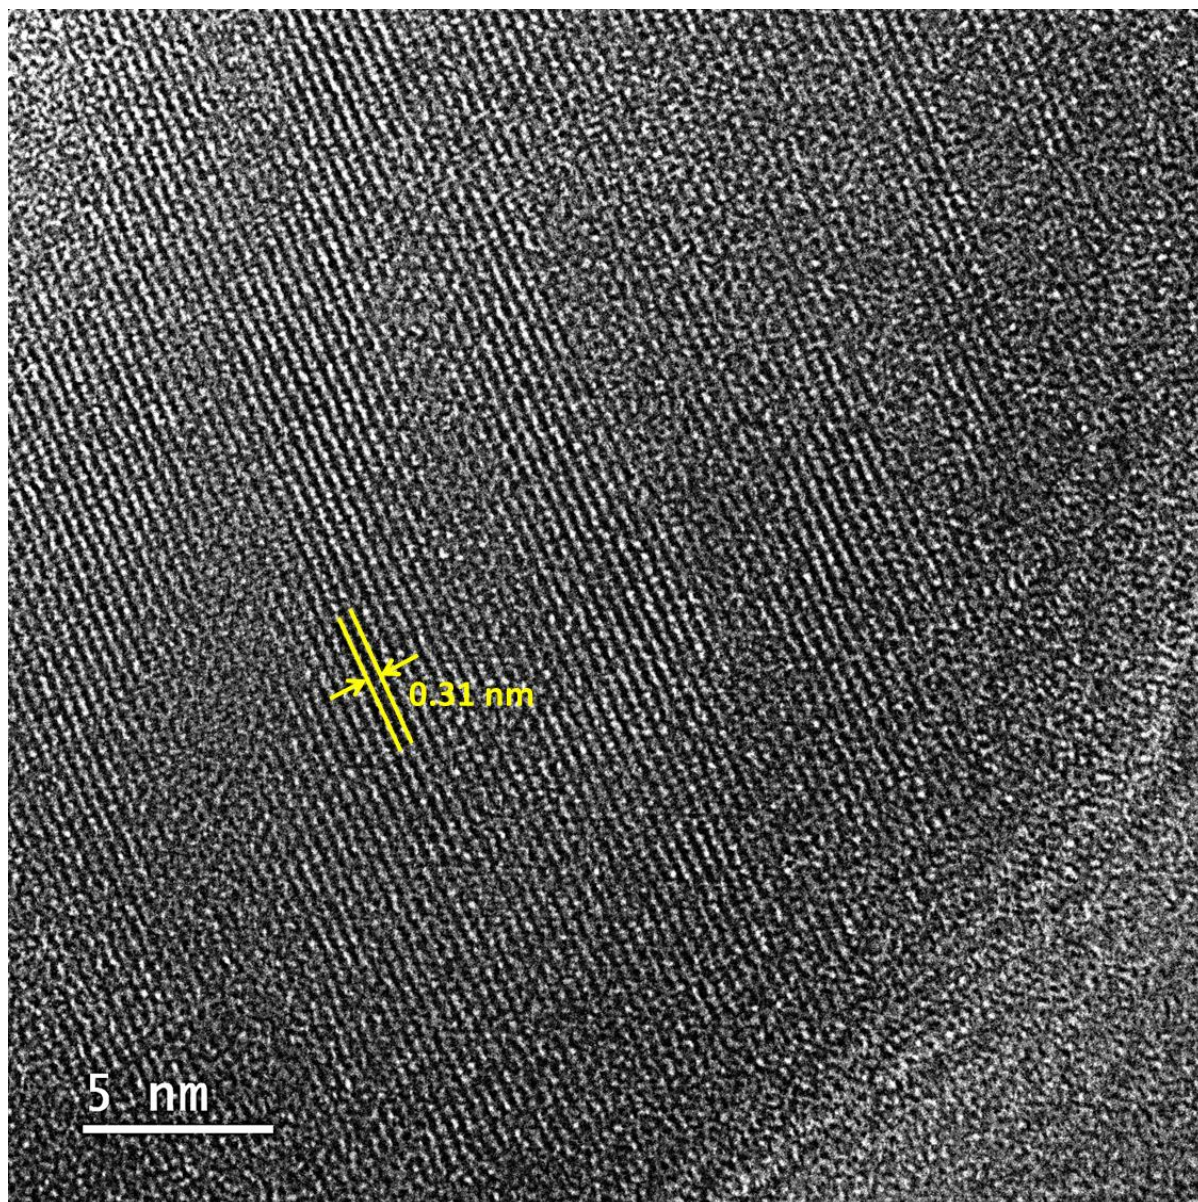

**Fig. S16** Large-sized TEM image (raw data) of the synthesized CsSnI<sub>3</sub> perovskite crystal with the conventional method.

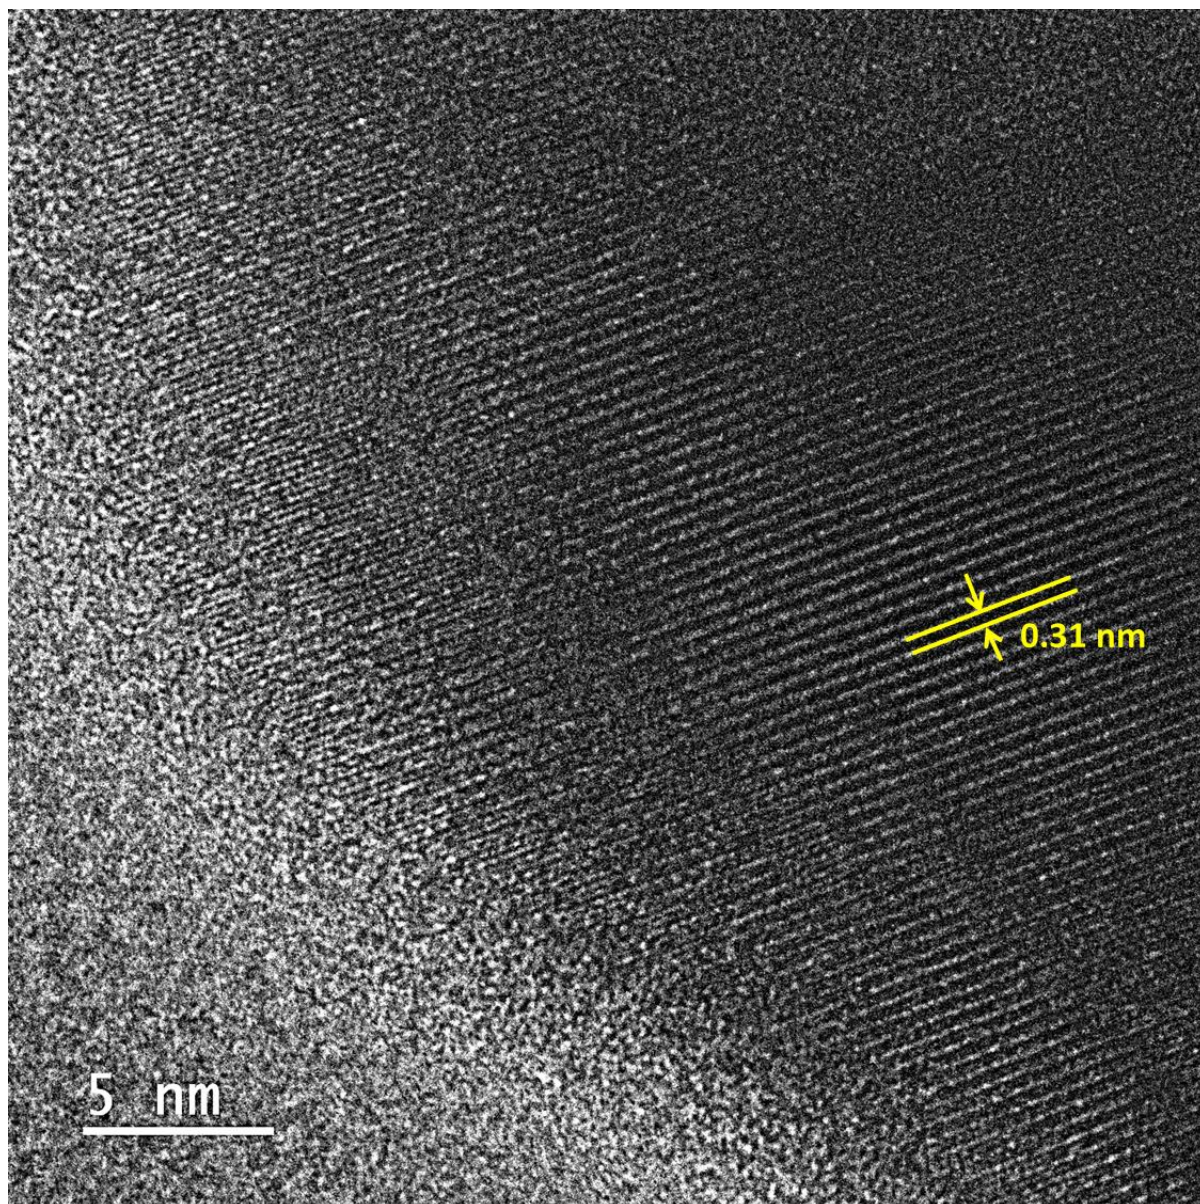

**Fig. S17** Large-sized TEM image (raw data) of the synthesized CsSnI<sub>3</sub> perovskite crystal with the two-step process.
